# Supplementary material for: Advances in Management and Therapeutics of Cutaneous Basal Cell Carcinoma
Source: Cancers (Basel). 2022 Jul 30;14(15):3720. doi: 10.3390/cancers14153720 (PMC9367462; doi:10.3390/cancers14153720)
Supplement: Supplementary file 1 [file cancers-14-03720-s001.zip › cancers-1820863-supplementary.pdf]

**Supplementary Table S1. Risk-stratified clinicopathologic features of basal cell carcinoma.**

|                                   | <b>Lower-risk BCCs</b>                                                                                                                      | <b>Higher-risk BCCs</b>                                                                                                                                                                                                                                               |
|-----------------------------------|---------------------------------------------------------------------------------------------------------------------------------------------|-----------------------------------------------------------------------------------------------------------------------------------------------------------------------------------------------------------------------------------------------------------------------|
| <b>Histologic features</b>        | <ul style="list-style-type: none"> <li>▪ Growth pattern: Superficial, Nodular</li> <li>▪ Absent perineural invasion</li> </ul>              | <ul style="list-style-type: none"> <li>▪ Growth pattern: morpheaform, infiltrative, micronodular, sclerosing, basosquamous</li> <li>▪ Present perineural invasion</li> <li>▪ Gross bone invasion</li> </ul>                                                           |
| <b>Anatomic locations</b>         | <ul style="list-style-type: none"> <li>▪ Trunk and extremities, excluding pretibial surface, hands, feet, nail units, and ankles</li> </ul> | <ul style="list-style-type: none"> <li>▪ Medium risk: cheeks, scalp, forehead, neck, jawline, pretibial surface</li> <li>▪ Higher risk: face (other areas), ears, hair-bearing lip, postauricular skin, hands, feet, nipples/areola, genitalia, nail units</li> </ul> |
| <b>Size in greatest dimension</b> | <ul style="list-style-type: none"> <li>▪ Low risk: <math>\leq 2</math> cm</li> </ul>                                                        | <ul style="list-style-type: none"> <li>▪ Medium risk: <math>&gt;2</math> cm and <math>\leq 4</math> cm</li> <li>▪ Higher risk: <math>&gt; 4</math> cm</li> </ul>                                                                                                      |
| <b>Patient comorbidities</b>      | <ul style="list-style-type: none"> <li>▪ No immunosuppressive conditions</li> <li>▪ No cancer-predisposing genetic syndromes</li> </ul>     | <ul style="list-style-type: none"> <li>▪ Immunosuppressive conditions</li> <li>▪ Basal cell nevus syndrome, xeroderma pigmentosum, and other syndromes at high-risk for skin cancer</li> </ul>                                                                        |
| <b>Occurrence</b>                 | <ul style="list-style-type: none"> <li>▪ Primary</li> </ul>                                                                                 | <ul style="list-style-type: none"> <li>▪ Recurrent</li> </ul>                                                                                                                                                                                                         |
| <b>Invasiveness</b>               | <ul style="list-style-type: none"> <li>▪ Less invasive: localized tumors</li> </ul>                                                         | <ul style="list-style-type: none"> <li>▪ Invasive: Locally-advanced BCC, metastatic BCC</li> </ul>                                                                                                                                                                    |
